# Supplementary material
Source: HighWire-hosted journal article supplement (https://gut.bmj.com/content/74/5/787)
Supplement: inline-supplementary-material-12 [file inline-supplementary-material-12.pdf]

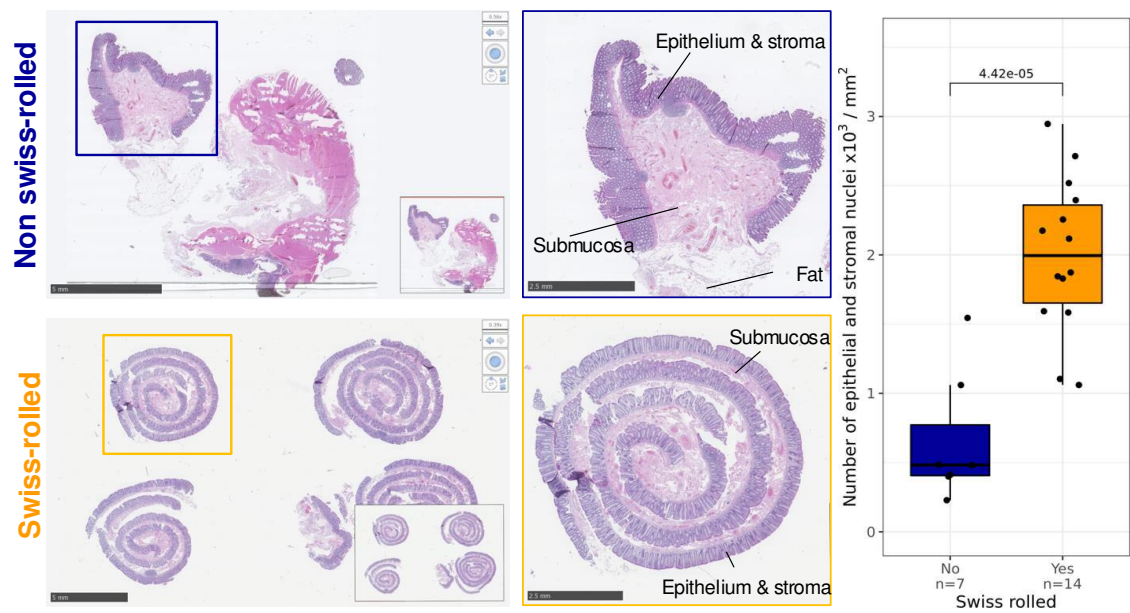

**Figure S7. Optimisation of epithelial cell collection for detection of rare cell types.** Haematoxylin and eosin stained samples of healthy colonic epithelium pre- (top) and post- (bottom) optimisation of 'swiss-rolling' method. Images taken using NDP View 2. P-value calculated by unpaired t-test.
