# Supplementary material
Source: HighWire-hosted journal article supplement (https://gut.bmj.com/content/74/5/787)
Supplement: inline-supplementary-material-15 [file inline-supplementary-material-15.pdf]

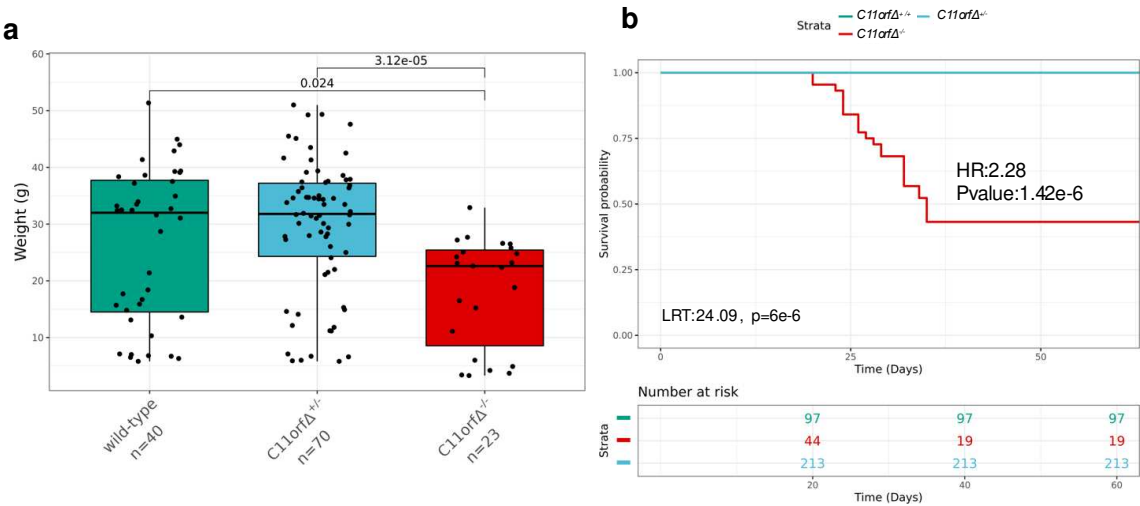

**Figure S8. *C11orfΔ*<sup>-/-</sup> mice exhibit reduced weight and overall survival.** Weight (a) and survival (b) of *C11orfΔ* mice. P values for weight comparisons are calculated by Benjamini-Hochberg correction of unpaired Wilcoxon ranks sum tests. Survival P-value calculated by cox proportional hazards model. LRT=Likelihood ration test, HR=Hazard Ratio.
